# Supplementary material for: Targeting mTOR pathway inhibits tumor growth in different molecular subtypes of triple-negative breast cancers
Source: PubMed Central journal article supplement (PMC5217012; doi:10.18632/oncotarget.10195), 2016-06-21
Supplement: oncotarget-07-48206-s001.pdf [file oncotarget-07-48206-s001.pdf]

## Targeting mTOR pathway inhibits tumor growth in different molecular subtypes of triple-negative breast cancers

### SUPPLEMENTARY FIGURES AND TABLE

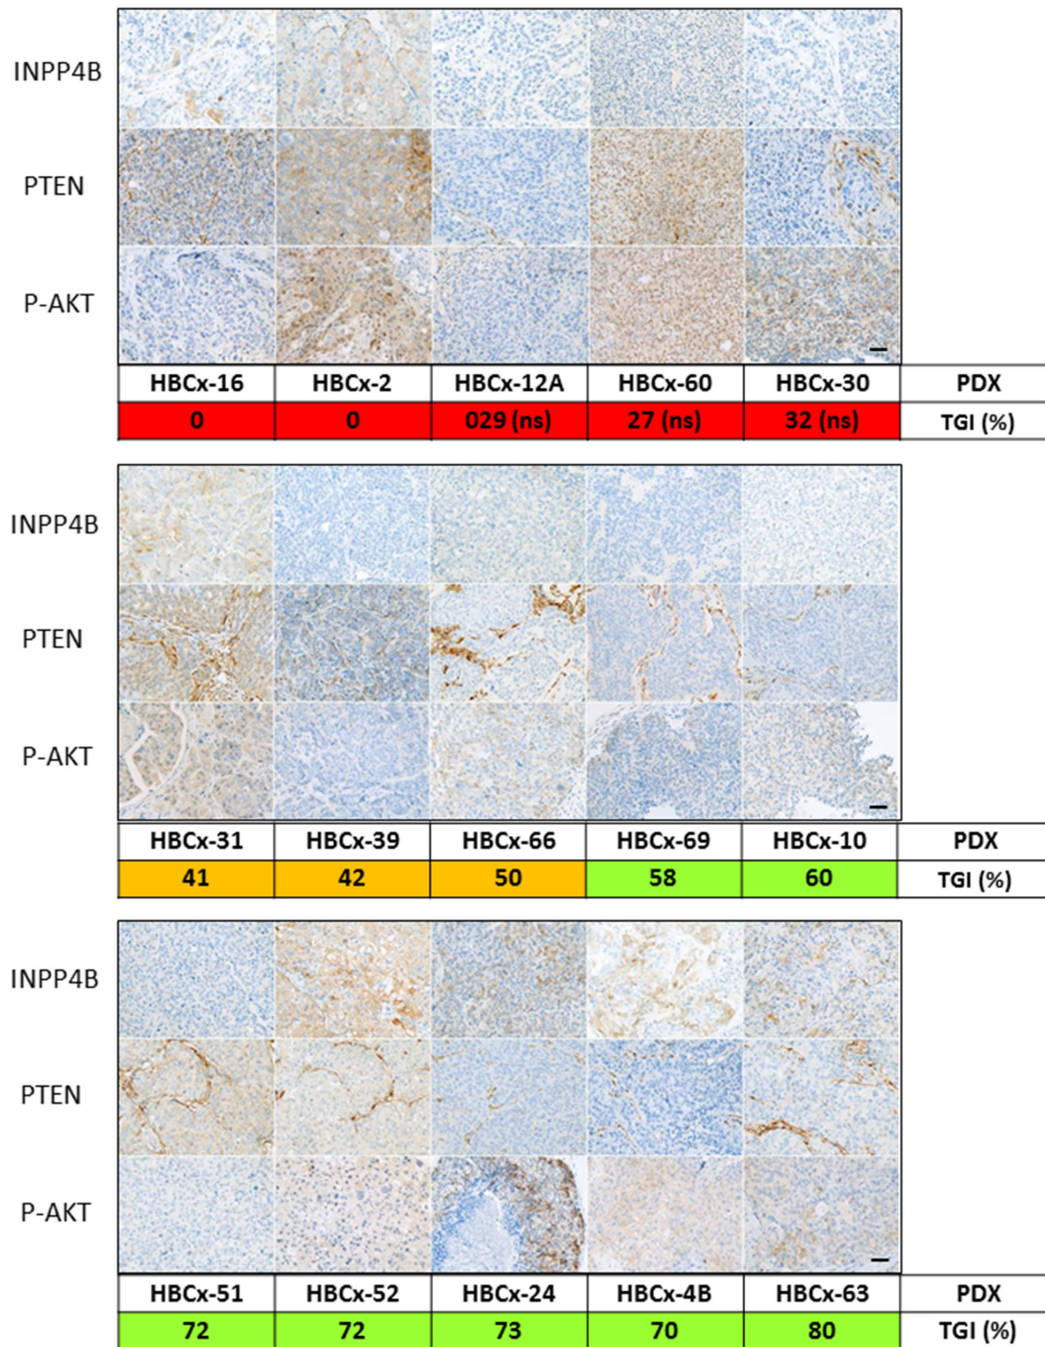

Supplementary Figure S1: Expression of PTEN, INPP4B and P-AKT determined by IHC analysis in the 15 PDX models of Table 2. Scale bar = 50  $\mu$ m (20x). Response to everolimus is indicated for each PDX model by the TGI (tumor growth inhibition) percentage. Red, orange and green colors indicate resistant, low responder and responder models, respectively.

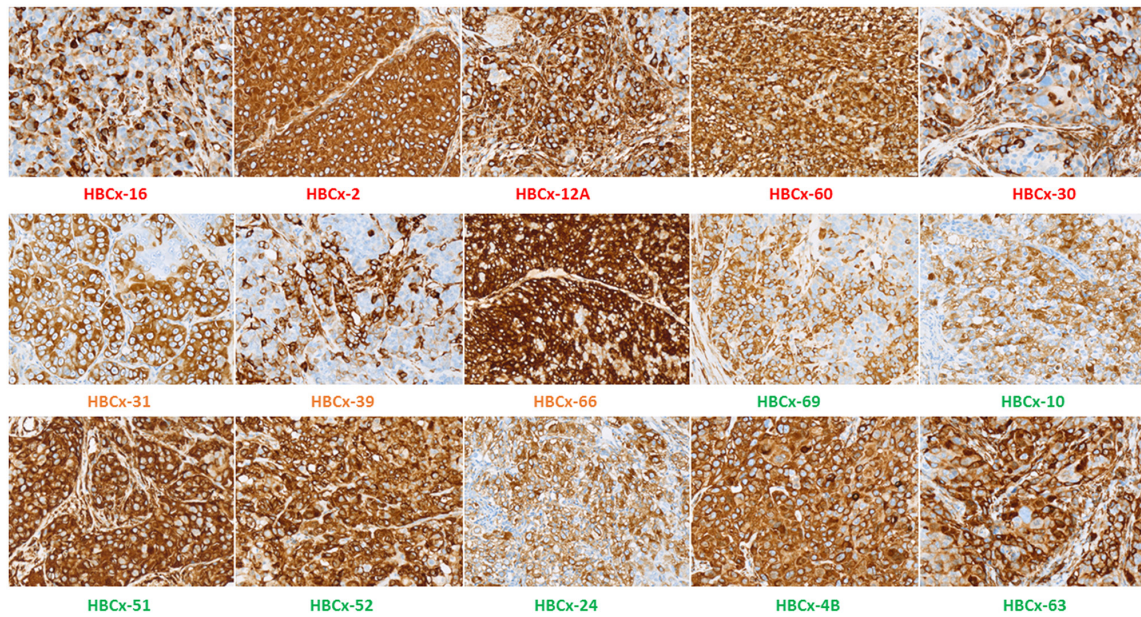

**Supplementary Figure S2: Expression of P-S6 determined by IHC in the 15 PDX models.** Red: everolimus-resistant PDX, orange: everolimus low responder, green: everolimus-responder PDX.

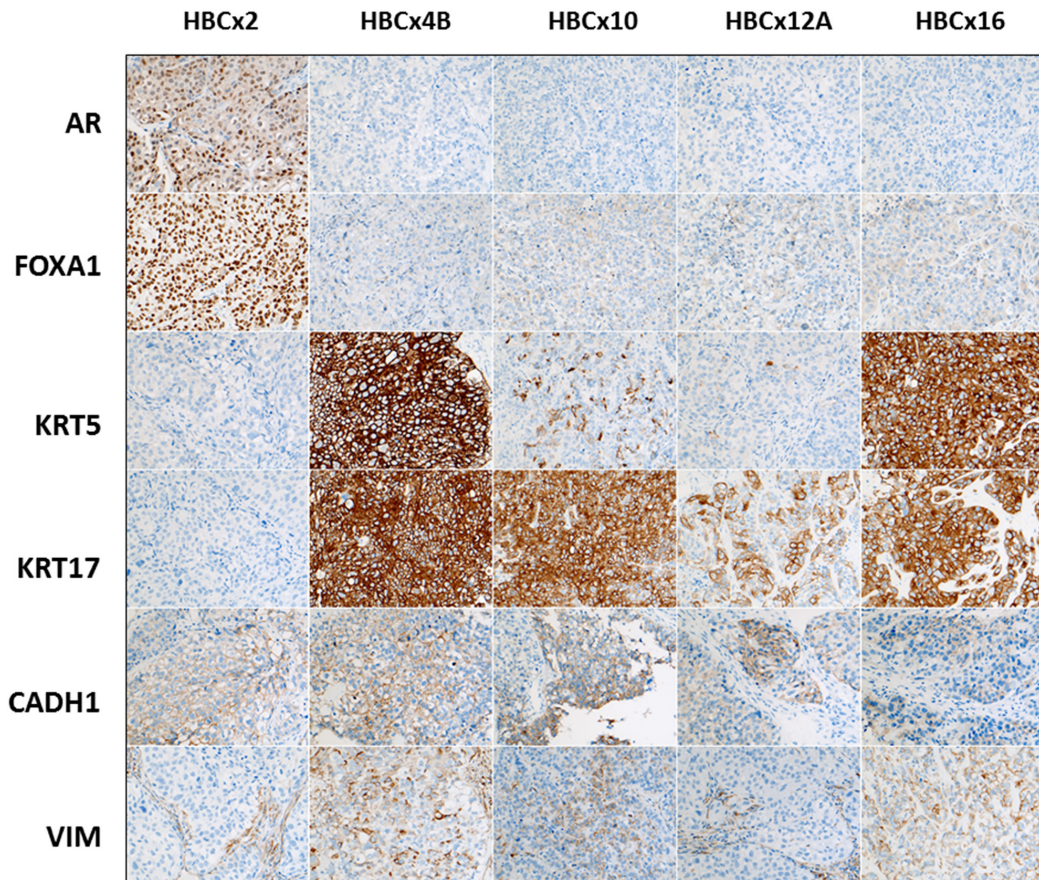

**Supplementary Figure S3: Expression of AR, FOXA1, KRT5, KRT17, CDH1 and Vimentin in HBCx-2, HBCx-4B, HBCx-10, HBCx-12A and HBCx-16.**

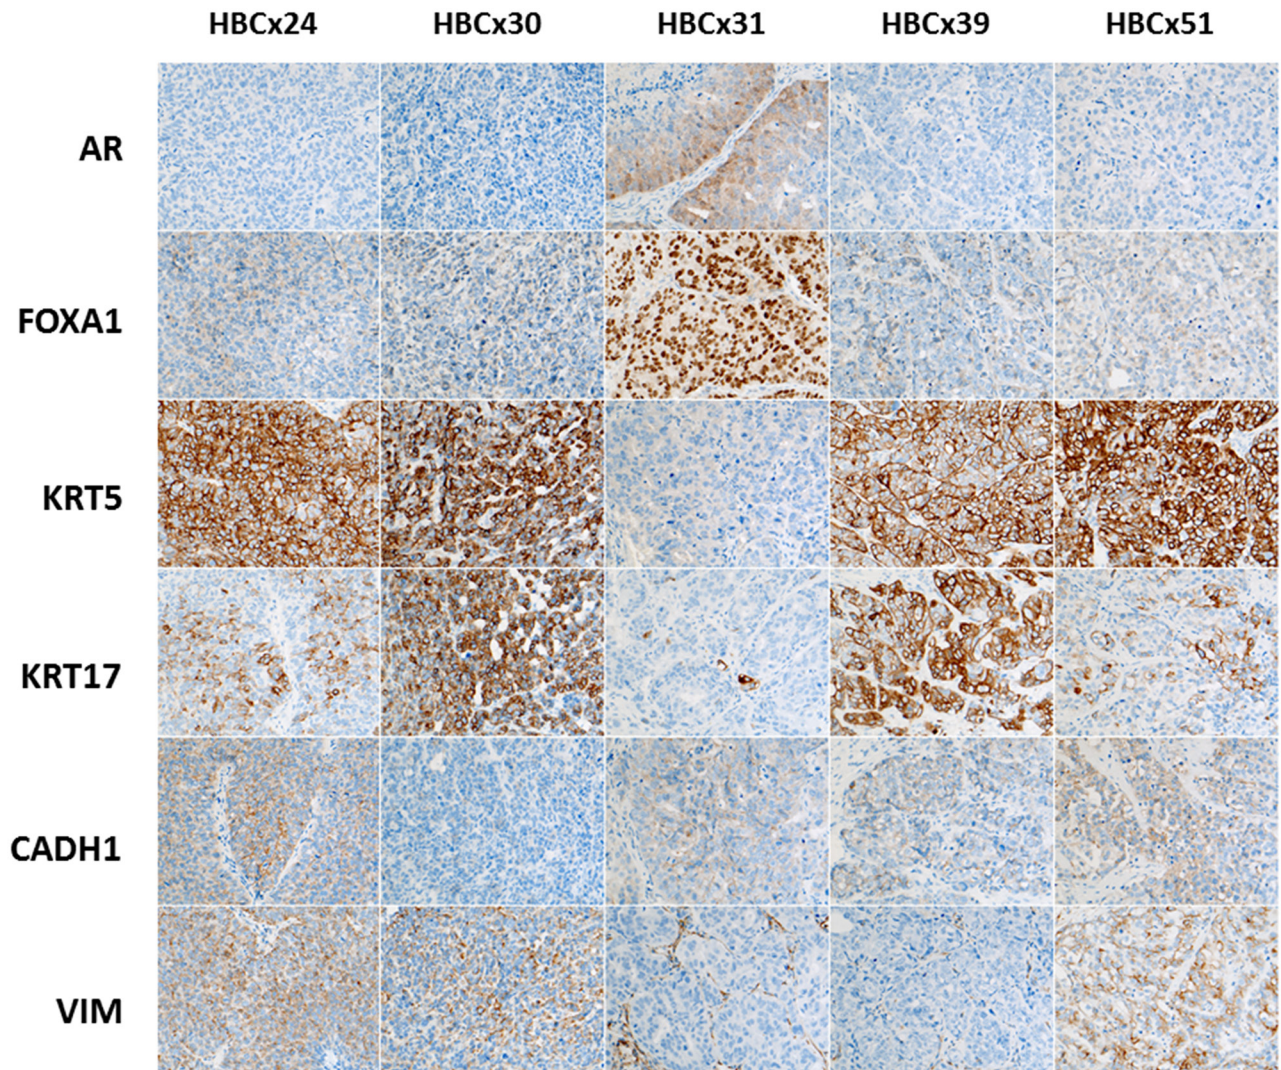

Supplementary Figure S4: Expression of AR, FOXA1, KRT5, KRT17, CDH1 and Vimentin in HBCx-24, HBCx-30, HBCx-31, HBCx-39 and HBCx-51.

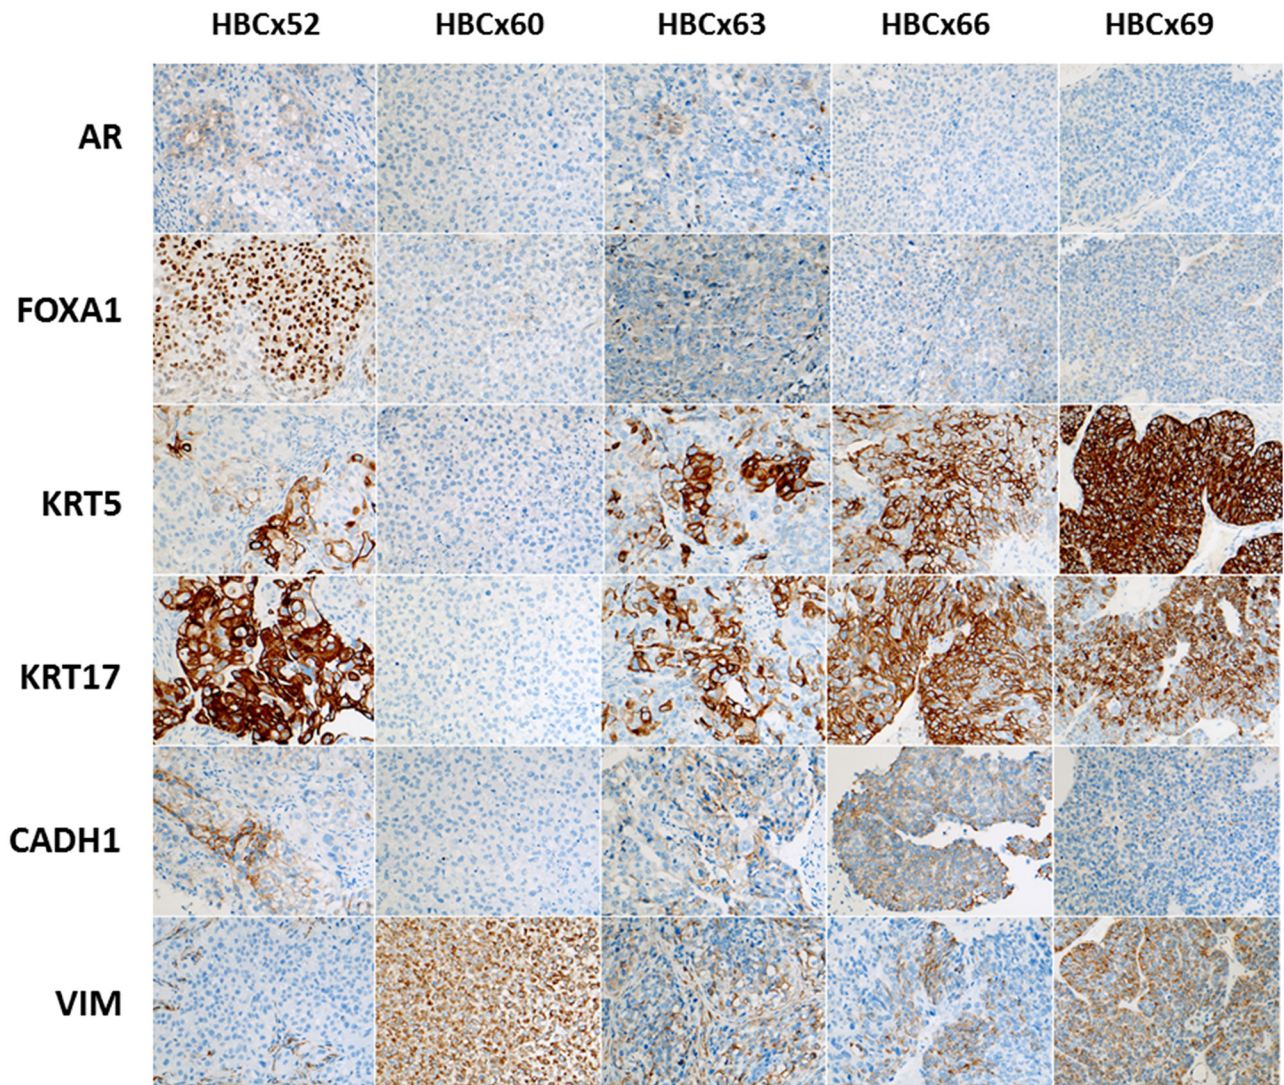

Supplementary Figure S5: Expression of AR, FOXA1, KRT5, KRT17, CDH1 and Vimentin in HBCx-52, HBCx-60, HBCx-63, HBCx-66 and HBCx-69.

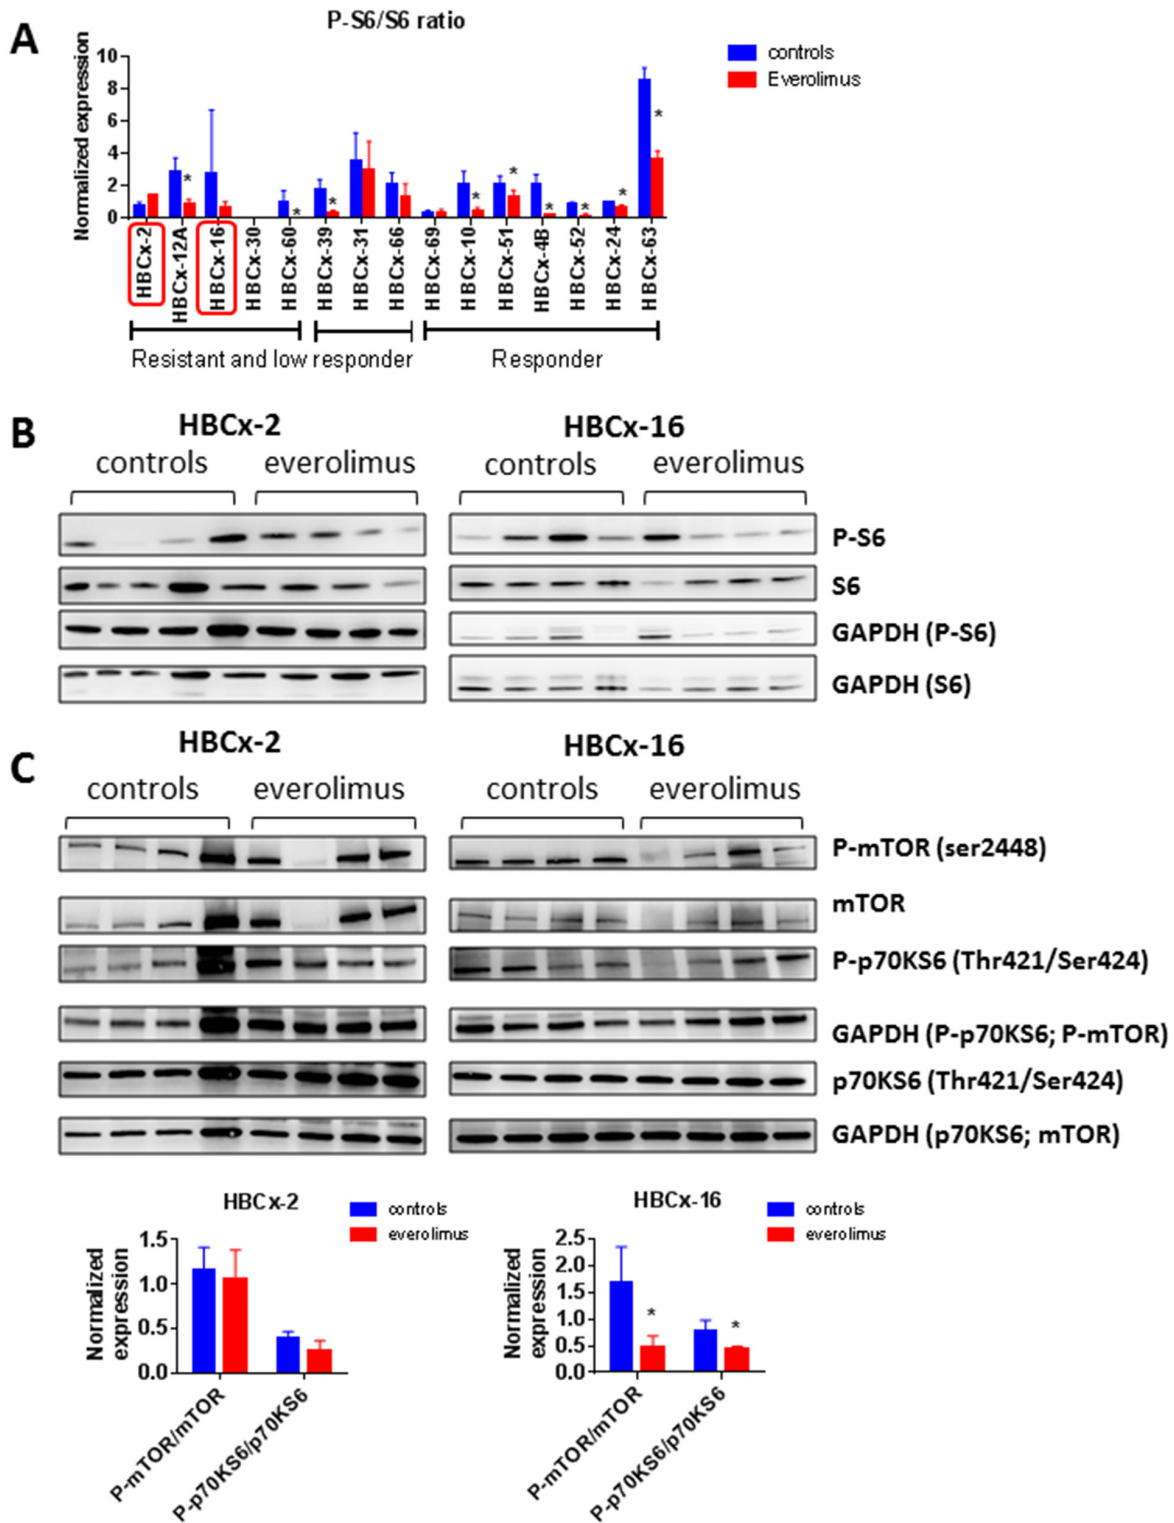

**Supplementary Figure S6: A.** Ratio of P-S6/S6 in control and treated tumors normalized from Western Blot (mean of 4 xenografts +/- SD). **B.** Western Blot analysis of P-S6 and S6 in 2 everolimus-resistant PDX: HBCx-2 and HBCx-16. **C.** Western Blot analysis of P-mTOR (ser2448), mTOR, P-p70KS6 (Thr421/Ser424) and P-p70KS6. Each protein was normalized against GAPDH and ratio of phosphorylated/total proteins were calculated with GAPDH-normalized values.

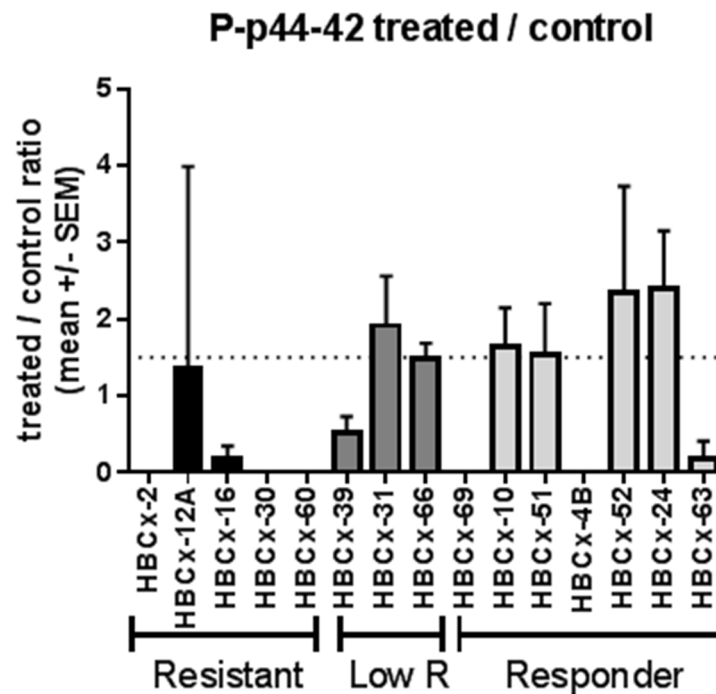

**Supplementary Figure S7: Ratio of Phospho-p44/42 MAPK in treated tumors versus control.** Normalization of P-p44/42 was performed on GAPDH expression. For each PDX model, the ratio of normalized P-p44/42 in everolimus-treated tumors versus normalized P-p44/42 in control tumors was calculated as follow: mean of P-p44/42 /GAPDH in 4 everolimus-treated xenografts / mean of P-p44/42 /GAPDH in 4 control xenografts.

**Supplementary Table S1: Response to everolimus and chemotherapies in the 15 PDX models. AC=doxorubicin + cyclophosphamide**

| PDX      | Response to AC | Response to Docetaxel | Response to Everolimus (TGI) |
|----------|----------------|-----------------------|------------------------------|
| HBCx-2   | resistant      | resistant             | 0%                           |
| HBCx-12A | resistant      | resistant             | 29% (ns)                     |
| HBCx-16  | responder      | resistant             | 0%                           |
| HBCx-30  | responder      | low responder         | 30% (ns)                     |
| HBCx-60  | Not done       | Not done              | 27% (ns)                     |
| HBCx-39  | resistant      | resistant             | 42%                          |
| HBCx-31  | responder      | responder             | 41%                          |
| HBCx-66  | responder      | resistant             | 50%                          |
| HBCx-69  | low responder  | low responder         | 58%                          |
| HBCx-10  | responder      | resistant             | 60%                          |
| HBCx-51  | resistant      | responder             | 72%                          |
| HBCx-4B  | resistant      | resistant             | 70%                          |
| HBCx-52  | not done       | not done              | 72%                          |
| HBCx-24  | resistant      | responder             | 73%                          |
| HBCx-63  | resistant      | resistant             | 80%                          |
